# Supplementary material
Source: PubMed Central journal article supplement (PMC6557128)
Supplement: NIHMS1030123-supplement-1.pdf [file NIHMS1030123-supplement-1.pdf]

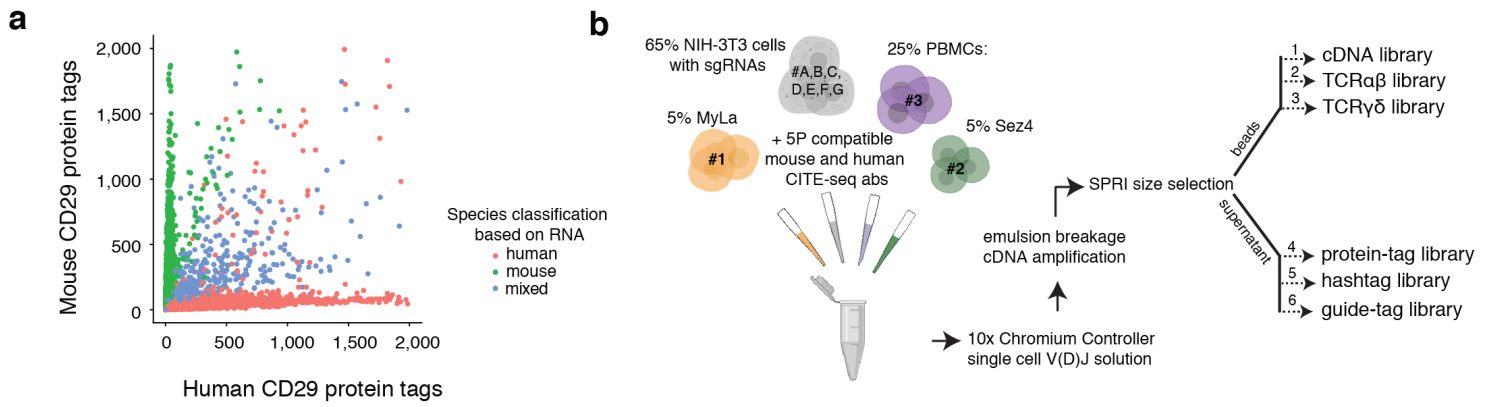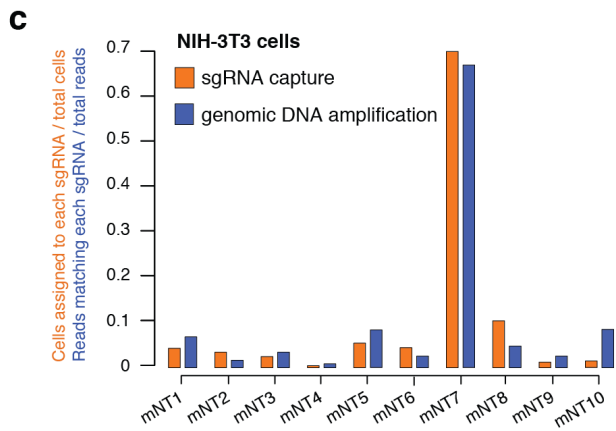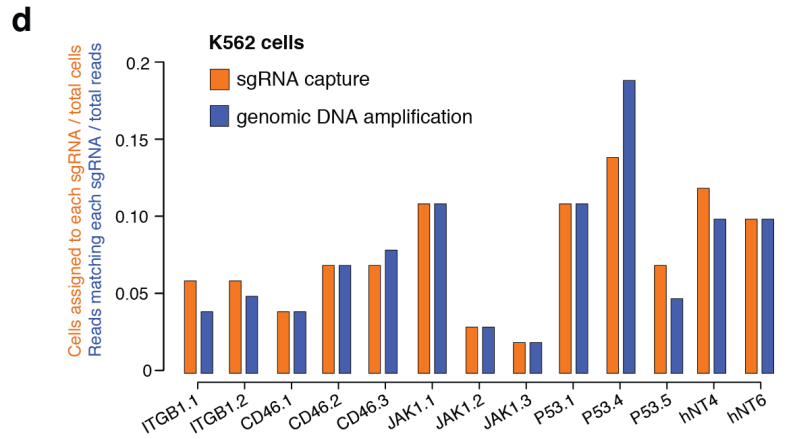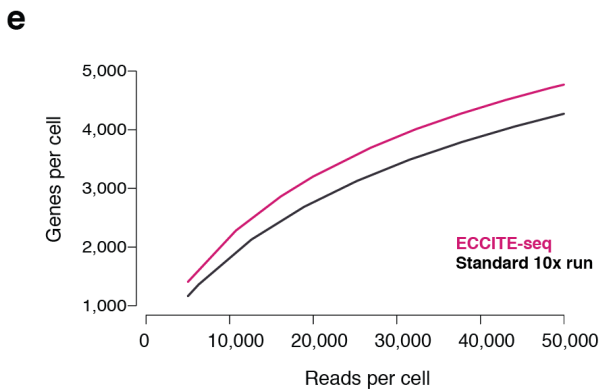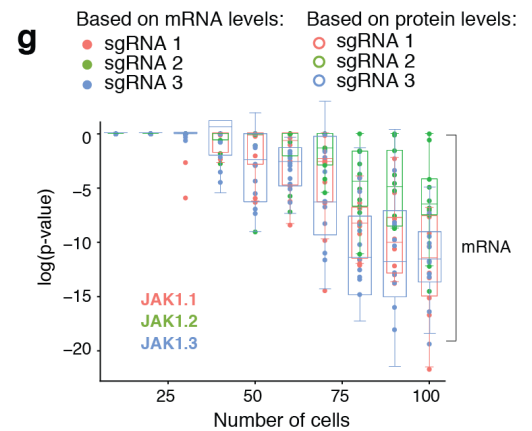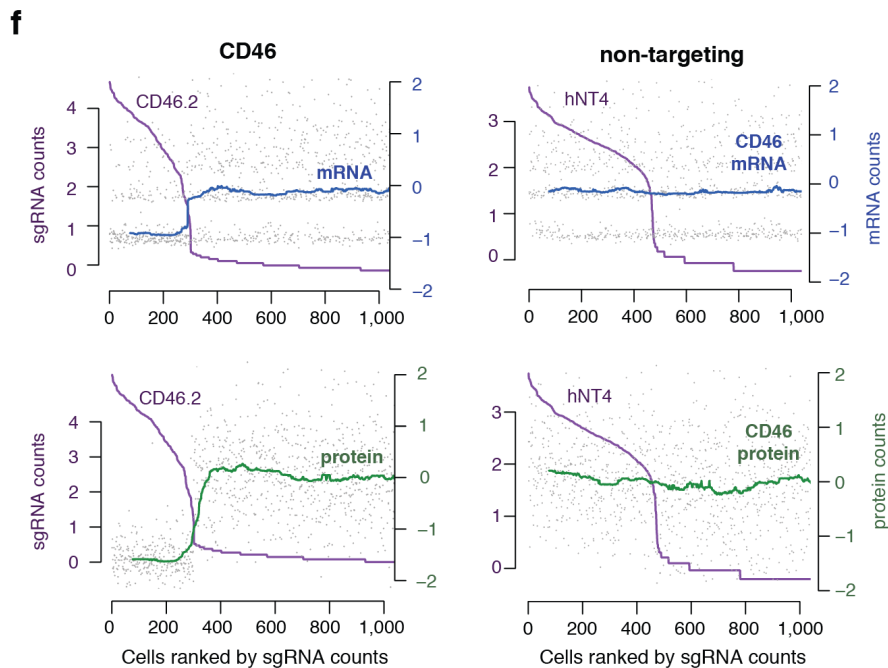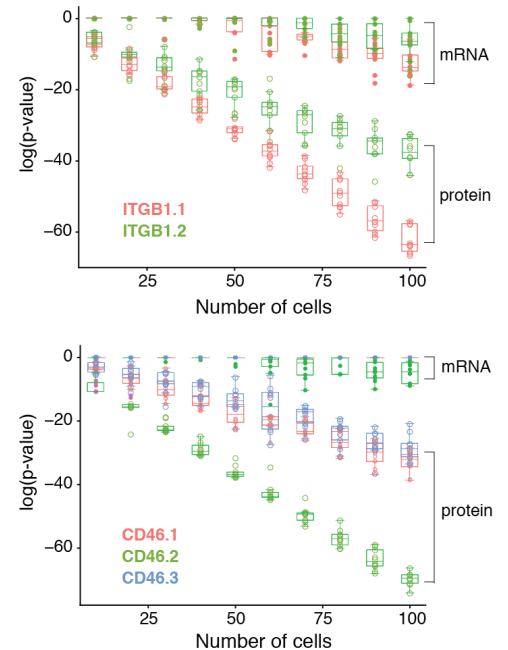

**Supplementary Figure 1: ECCITE-seq enables CRISPR screens with single cell multimodal readout.**

**a.** Species-mixing proof-of-principle experiment: protein tag reads associated with each cell barcode. Points are colored based on species classification using transcripts as shown in Fig. 1b. About 1.2% of either human or mouse cells show cross-reactivity with mouse or human antibodies respectively. **b.** Mixed-species ECCITE-seq experiment demonstrating measurement of six cellular modalities. Cells of different origin were stained with ECCITE-seq and hashing antibodies, washed and combined to a single 10x run. All cells were stained with a mix of anti-human CD29 and anti-mouse CD29 antibodies. NIH-3T3 cells were split into 7 tubes and stained with 7 barcoded hashing antibodies (Hashtag-A to Hashtag-G), followed by washing and pooling. MyLa, Sez4 and PBMCs were stained with Hashtag\_1, Hashtag\_2 and Hashtag\_3 respectively. Eventually, a cell mix comprising 65% NIH-3T3 cells, 25% PBMCs, and 5% each MyLa and Sez4 cells was loaded into the 10x Chromium for droplet formation and reverse transcription. After emulsion breakage and cDNA amplification, the distinctly sized products were separated with size selection capture beads and amplified separately. A pool consisting 88% cDNA, 7% guide-tag, 3% hashtag and 2% protein-tag library was submitted for NGS sequencing. **c,d.** sgRNA representation as measured by direct sgRNA capture or genomic DNA amplification of the guide variable region in two different cell lines. To assess the direct capture, we assigned a guide to each cell with a single sgRNA and quantified their proportion in the total cell population (orange). This ratio is compared to the ratio of genomic reads matching each sgRNA to the total genomic sgRNA reads. **e.** scRNA-seq saturation curves for the ECCITE-seq versus standard 10x V(D)J run using the K562 cells expressing the targeting sgRNA library. The same cell suspension was used into two parallel experiments; one underwent a standard 10x V(D)J run while the other was preceded by staining with CITE-seq and hashing antibodies, as well as spike-in of guide RT primer in the reverse transcription reaction. For this analysis, data were downsampled to the same total reads per cell after correcting for the different fraction of reads in cell. **f.** Levels of target mRNA or protein (moving median smoothing window = 151) in 1,000 cells ranked on decreasing sgRNA counts for CD46 sgRNA 2 or non-targeting sgRNA 4. **g.** Adjusted p-values of detecting the indicated gene expression or protein abundance change as a function of cell number. Different-size, randomized cell samples assigned to unique targeting sgRNAs were used against equal size, randomized cell samples from the non-targeting sgRNAs groups.

**a** Control PBMCs

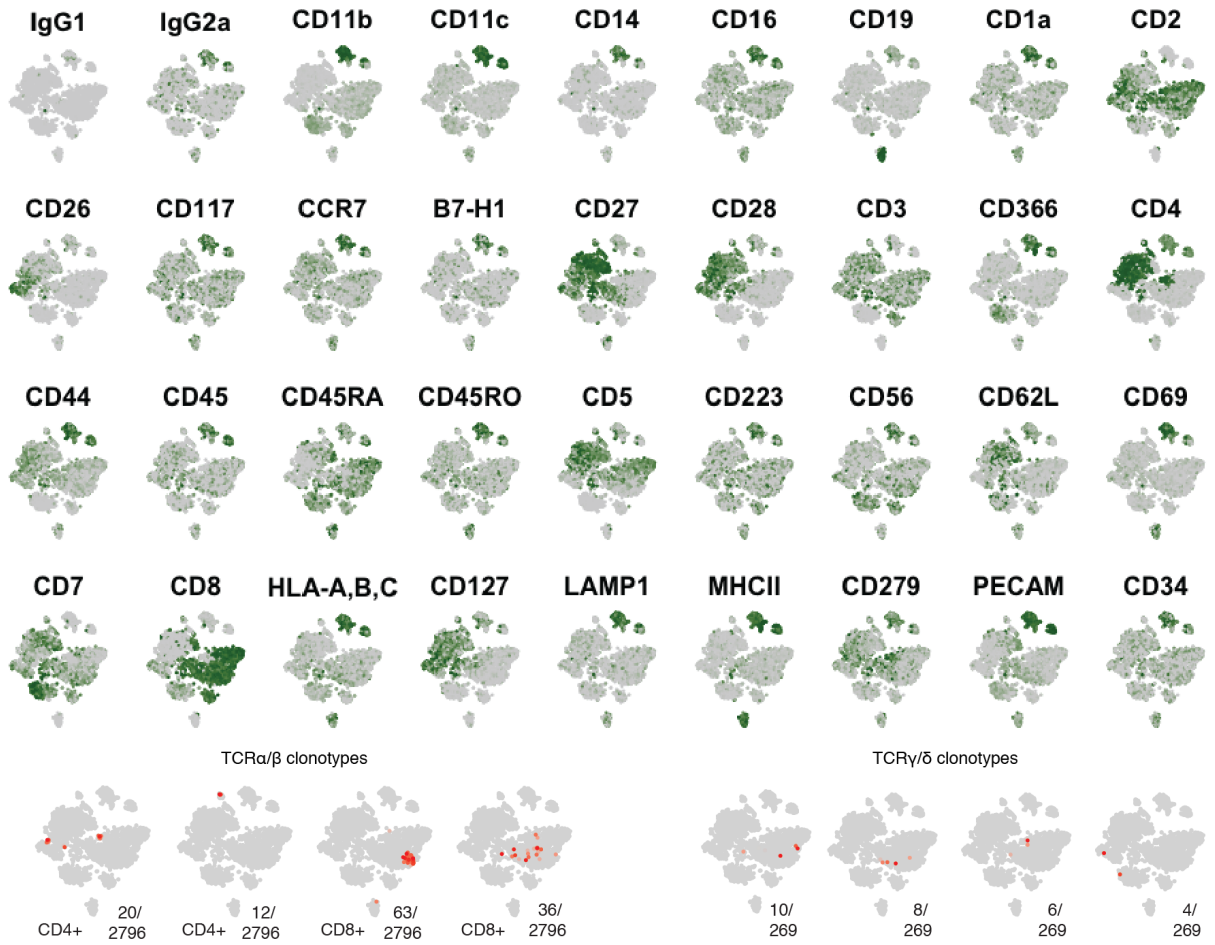

**b** CTCL PBMCs

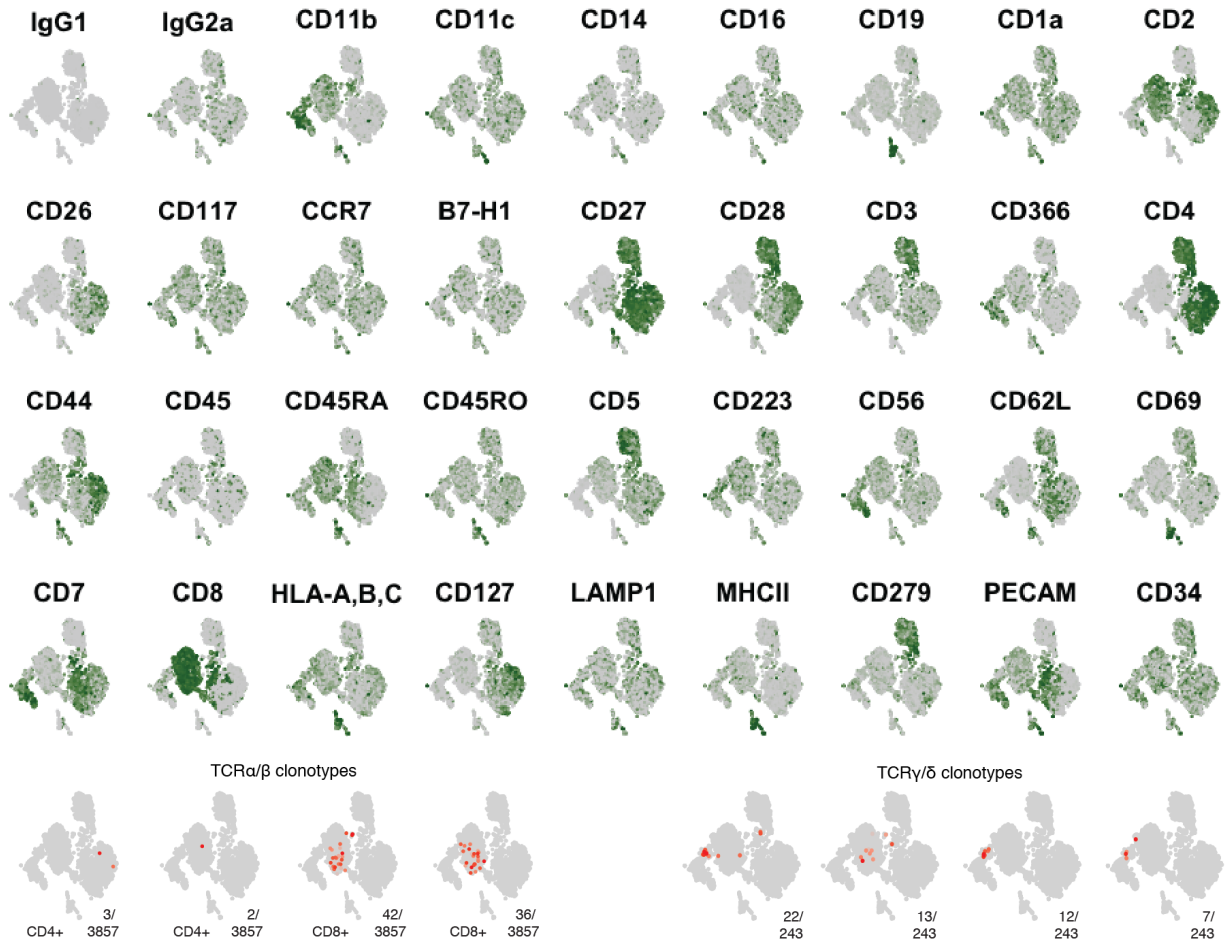

**Supplementary Figure 2: Surface protein and clonotype detection on PBMCs from a healthy donor and a CTCL patient.** **a.** Transcriptome-based clustering of PBMCs from healthy donor after removing cell doublets. Projected is the protein signal for 36 out of 49 antibodies used to stain the cells, as well as the 2<sup>nd</sup> and 3<sup>rd</sup> most abundant CD4+ or CD8+ TCR $\alpha/\beta$  or the 3<sup>rd</sup>, 4<sup>th</sup>, 5<sup>th</sup> and 6<sup>th</sup> most abundant TCR $\gamma/\delta$  clonotype (red). **b.** Same analysis as panel a, using data from CTCL patient PBMCs.

**a.** Gene expression-based cluster assignment

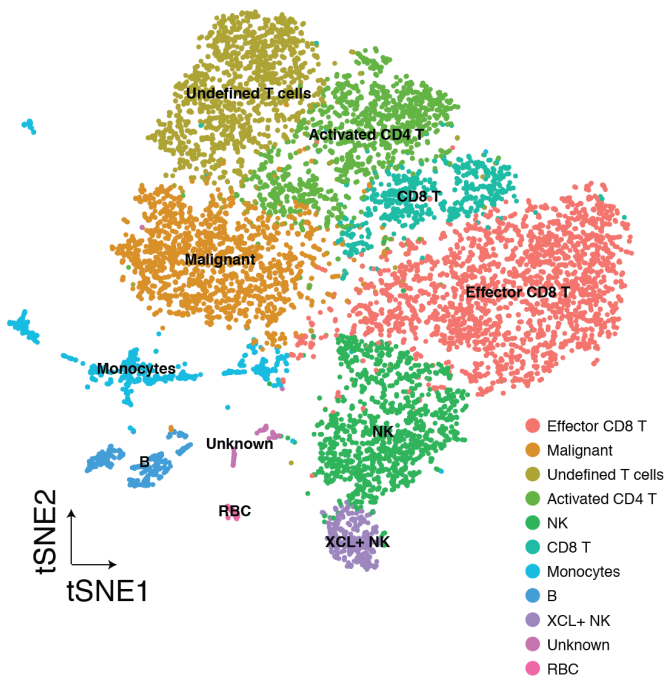

Surface marker-based cluster assignment

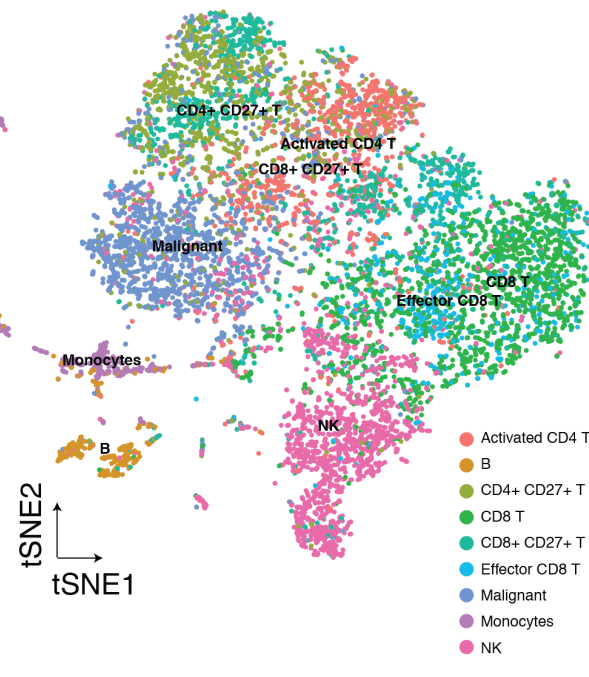

**b.** Gene expression-based cluster assignment

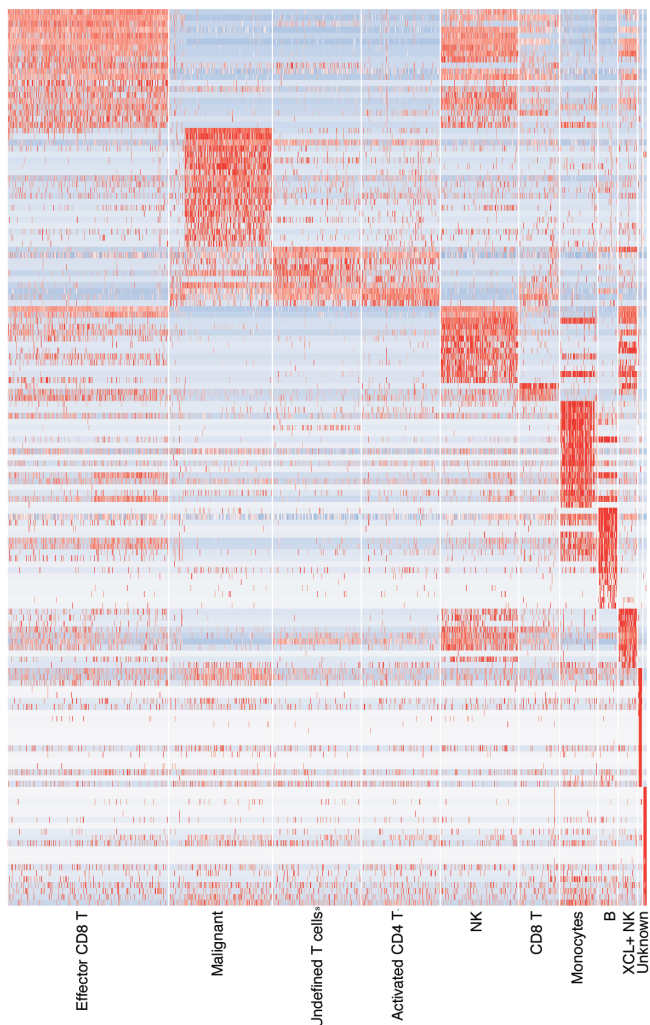

Surface marker-based cluster assignment

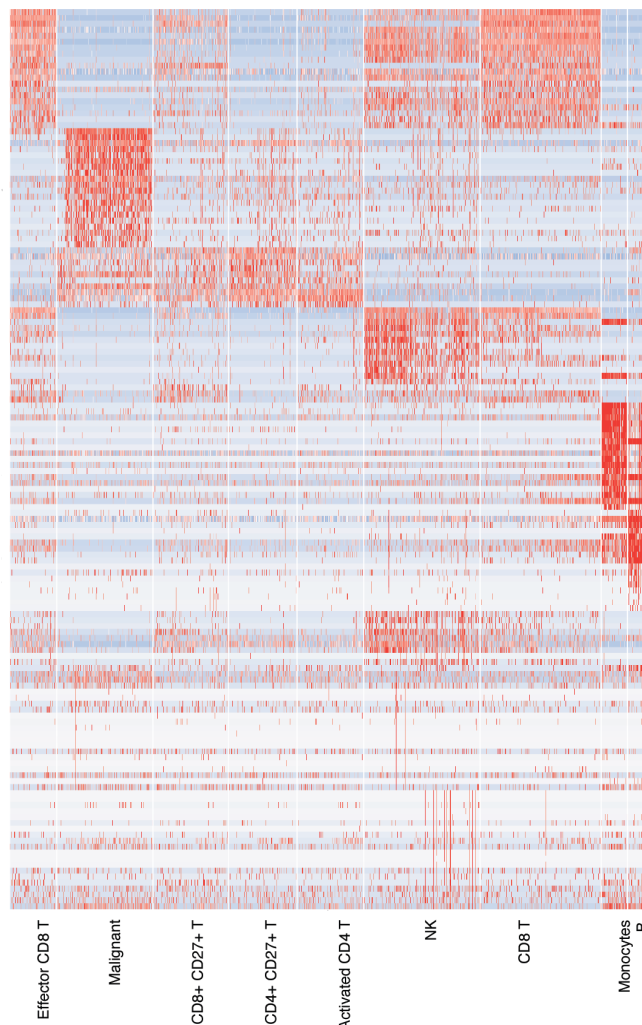

- GSM1
- CCL5
- CD8A
- CD77
- FGFBP2
- NG2
- CD26
- CD28
- CCL4
- CD86
- LITAF
- G2MA
- ZNF668
- C12orf75
- ADGRG1
- PPP1
- PLEK
- KLRJ1
- ZEB2
- PRSS23
- TRBV20-1
- TRAV25
- NOBP
- SPIN1
- KRT11
- C1orf228
- SCM4
- CFRP2
- ITGA2
- STMN1
- MARCKS1
- GATA3
- TSN22
- LAR
- EEDP1
- PAGE
- IGFBP4
- LMC4
- POML1
- LMNA
- SELL
- LDHB
- MAL
- CCR7
- LEP1
- MYC
- TCF7
- LTB
- IL7R
- ACPP
- ONLY
- CTSW
- TYROBP
- SPON2
- HSP7
- MYO2
- TRC
- KLRP1
- FOXP3A
- CLIC3
- SRGD1B
- FCER1B
- TTC38
- G2M6
- DUSP2
- LYN1
- CS13
- LEP1
- SAT1
- SPH
- AP1
- LYZ
- HLA-DRA
- FCN1
- HEAT1
- SERPINA1
- CTSS
- S100P
- HLA-DRE5
- PSG3
- S100A8
- TYMP
- HLA-DPB1
- VCAN
- CD79A
- CD74
- HLA-DQA1
- MSA1
- MEZC
- HLA-DPB1
- HLA-DPA1
- HLA-DQA2
- BANK1
- CD79B
- IGKC
- UNC95B
- JCHAIN
- IGBA1
- IGJ1
- IGLC2
- IGLJ2
- KLRJ1
- XCL1
- CAC1
- PLA2G3
- CD7
- IL2FB
- SPTSSB
- KLRK3
- CADP3
- TUBA1B
- TUBB
- TUBB4B
- HIST1H3C
- HIST1H4E
- TUBA1C
- PIE
- HIST1H4A
- ACTA2
- EEF1A2
- ACTA1
- TUBA2C
- MYL9
- HNF4F
- POTEE
- TUBB8
- TUBB4A
- TUBA4A
- TUBB6
- PABPC4
- HBD
- HEA2
- HBA1
- ALAS2
- SNCA
- SLC35A37
- CA1
- DCAF17
- HBB
- SNFSL
- HBM
- ANP
- TRIM68
- ADIPOR1
- FAM108B
- YBX3
- SLC35A39
- NCOM
- MKN1
- GFY1

Supplementary Figure 3: Gene expression and surface marker-based clustering of the combined dataset. **a.** Unsupervised clustering of PBMCs from both healthy and CTCL donors ( $n=9,816$ ) after removing cell duplicates, merging, depth-normalization, and cell alignment<sup>28</sup>. Each cell was colored and labeled based on unsupervised clustering information on gene expression (left) or surface marker (right). **b.** Heatmap of genes differentially expressed across gene expression-based (left) or surface marker-based (right) cluster assignments.

Supplementary Table 1: Human sgRNA sequences

<sup>a</sup>HEK cells for mixed-species experiment

\*K562 cells

| <b>target</b> | <b>name</b>         | <b>sequence</b>       |
|---------------|---------------------|-----------------------|
| -             | hNT1 <sup>a</sup>   | ACGGAGGCTAAGCGTCGCAA  |
| -             | hNT2 <sup>a</sup>   | CGCTTCCGCGGCCCGTTCAA  |
| -             | hNT3 <sup>a</sup>   | ATCGTTTCCGCTTAACGGCG  |
| -             | hNT4 <sup>a</sup> * | TAGGCGCGCCGCTCTCTAC   |
| -             | hNT5 <sup>a</sup>   | CCATATCGGGGCGAGACATG  |
| -             | hNT6 <sup>a</sup> * | TACTAACGCCGCTCCTACAG  |
| -             | hNT7 <sup>a</sup>   | TGAGGATCATGTGCGAGCGCC |
| -             | hNT8 <sup>a</sup>   | GGCCCGCATAGGATATCGC   |
| -             | hNT9 <sup>a</sup>   | TAGACAACCGCGGAGAAATGC |
| -             | hNT10 <sup>a</sup>  | ACGGGCGGCTATCGCTGACT  |
| <b>ITGB1</b>  | ITGB1.1*            | TAGGCCTCTGGGCTTTACGG  |
| <b>ITGB1</b>  | ITGB1.2*            | AGTACTTGTGAAGCCAGCAA  |
| <b>CD46</b>   | CD46.1*             | CGTACAGATATCTTCAAAGG  |
| <b>CD46</b>   | CD46.2*             | CCGATCACAAATAGTATGGG  |
| <b>CD46</b>   | CD46.3*             | CTGTCAAGTATTCCCTTCCTC |
| <b>JAK1</b>   | JAK1.1*             | GGACTCCAAGAACCTGAGTG  |
| <b>JAK1</b>   | JAK1.2*             | TATTCCTTAAGGCTTCCCGA  |
| <b>JAK1</b>   | JAK1.3*             | TCTCGTCATACAGGGCAAAG  |
| <b>TP53</b>   | TP53.1*             | GCAGTCACAGCACATGACGG  |
| <b>TP53</b>   | TP53.4*             | CATGTAGTTGTAGTGGATGG  |
| <b>TP53</b>   | TP53.5*             | TCCTCAGCATCTTATCCGAG  |

Supplementary Table 2: Mouse non-targeting sgRNA sequences

| <b>target</b> | <b>name</b> | <b>sequence</b>      |
|---------------|-------------|----------------------|
| -             | mNT1        | CGAGGTATTCGGCTCCGCG  |
| -             | mNT2        | CTTTCACGGAGGTTGACG   |
| -             | mNT3        | TAGTTGCAGTTCGGCTCGAT |
| -             | mNT4        | ACGTGTAAGGCGAACGCCTT |
| -             | mNT5        | ACTCCGGGTACTAAATGTC  |
| -             | mNT6        | CCGCGCCGTTAGGGAACGAG |
| -             | mNT7        | ATTGTTGACCGTCTACGGG  |
| -             | mNT8        | ACCCATCGGGTGCATATGG  |
| -             | mNT9        | CGGGCGTCACCTGCTAGTAA |
| -             | mNT10       | CTTCTACTCGCAACGTATT  |

Supplementary Table 3: ECCITE-seq antibody-oligo conjugates

| Antibody          | clone     | barcode          |
|-------------------|-----------|------------------|
| CD3E              | UCHT1     | TAGAACCGTATCCGT  |
| CD4               | RPA-T4    | TGTGGTAGCCCTTGT  |
| CD8A              | RPA-T8    | TATCCCTGCCTTGCA  |
| TCRb              | IP26      | TAGCAGTCACTCCTA  |
| TCRg              | B1        | CTATCGTTTGATGCA  |
| CD44              | BJ18      | ATCTGTATGTCACAG  |
| CD62L             | DREG-56   | AACCGCGCTTCAGAT  |
| Ox40 (CD134)      | Ber-ACT35 | GCGATTCATGTCACG  |
| PD1 (CD279)       | EH12.2H7  | GAGGCACTTAACATA  |
| PD-L1             | 29E.2A3   | GTTGTCCGACAATAC  |
| EpCAM (CD326)     | 9C4       | AAACTCAGGTCCTTC  |
| CD66b             | 6/40C     | GCGAGAAATCTGCAT  |
| MHCII (HLA-DR)    | L243      | GCCTAGTTTGAACGC  |
| CD45              | H130      | CGATTTGATCTGCCT  |
| CD19              | H1B19     | TCACGCAGTCCTCAA  |
| B220 (CD45R)      | RA3-6B2   | GTATAGACCAAAGCC  |
| CD11c             | 3.9       | CGTATGCCCTTTAGA  |
| CD14              | M5E2      | GCTTGGGCAATTAAG  |
| CD34              | 581       | TGGCTTAGCTTTACA  |
| CD56              | 5.1H11    | CGTATCTGTCAATTAG |
| CD16              | B73.1     | TATATCCCTCAACGC  |
| CD2               | TS1/8     | AATFCCGTGATGTA   |
| CD5               | UCHT2     | ATTCCCTCATTCTGA  |
| CD45RA            | HI100     | ACCCGTCCTAAGAA   |
| CD45RO            | UCHL1     | ACGTAGTCACCTAGT  |
| CCR7              | GO43H7    | ACTGCCATATCCCTA  |
| CD11b             | ICRF44    | CCATTCATTTGTGGC  |
| CD1a              | HI149     | CAACTTGGCCGAATC  |
| CD27              | M-T271    | ACGCAGTATTTCCGA  |
| CD69              | FN50      | CATTAGAGTCTGCCA  |
| PECAM (CD31)      | WM59      | CTCAGCCCTAGTATA  |
| CD138             | DL-101    | CTCGTTTGTAGCAAT  |
| CD24              | ML5       | GATTCCCTTTACGAGC |
| Siglec-8          | 7C9       | GAACCGTACCCATGA  |
| LAMP1             | H4A3      | GAGAAATCAACCAAG  |
| C-kit (CD117)     | 104D2     | CTTACCTAGTCATTC  |
| IL7Ralpha (CD127) | A019D5    | TTGTTGTATCCGATC  |
| CTLA4             | BNI3      | CAGAGCACCCATTAA  |
| HLA-A,B,C         | W6/32     | GGATGTACCGCGTAT  |
| CD77              | 5B5       | GTCATTGTATGTCTG  |
| CD366 (tim3)      | F38-2E2   | GGCAATTAGCGAGT   |
| CD223 (lag3)      | 11C3C65   | GCCATTCCCTGCCTAA |
| CD28              | CD28.2    | GACAGTCGATGCAAC  |
| CD7               | CD7-6B7   | CTCCCTAGTTCCTTT  |
| CD26 (Adenosine)  | BA5b      | TTCTTGACGAGGAT   |
| PD-1 (CD279)      | NAT105    | GTTGGATGGTAGACT  |
| PD-L1 (CD274)     | MIH1      | GCAGTTGTCCGATTC  |
| IgG1              | MOPC-21   | TCCTTTCTGATAGG   |
| IgG2a             | MOPC-173  | TCCCTTGCGATTTAC  |
| CD29 (human)      | TS2/16    | AATAGCGGAGCC     |
| CD46 (human)      | TRA-2-10  | GCCAATTGCACT     |
| CD29 (mouse)      | HMβ1-1    | CGAAGACCAAGA     |



Supplementary Table 4: Mouse hashing antibody-oligo conjugates

| <b>ANTIBODY<br/>COCKTAIL</b>                             | <b>HASHTAG</b> | <b>BARCODE</b> |
|----------------------------------------------------------|----------------|----------------|
| <b>CD29 (HMB1-1)<br/>CD45 (30-F11)<br/>B2M (A16041A)</b> | Hashtag_A      | AGGACCATCCAA   |
|                                                          | Hashtag_B      | TCGATAATGCGA   |
|                                                          | Hashtag_C      | GAGGCTGAGCTA   |
|                                                          | Hashtag_D      | GTGTGACGTATT   |
|                                                          | Hashtag_E      | ACTGTCTAACGG   |
|                                                          | Hashtag_F      | CACATAATGACG   |
|                                                          | Hashtag_G      | TAACGACGTGGT   |

Supplementary Table 5: Human hashing antibody-oligo conjugates

| <b>ANTIBODY<br/>COCKTAIL</b>        | <b>HASHTAG</b> | <b>BARCODE</b> |
|-------------------------------------|----------------|----------------|
| <b>CD298 (LNH-94)<br/>B2M (2M2)</b> | Hashtag_1      | ACATGTTACCGT   |
|                                     | Hashtag_2      | AGCTTACTATCC   |
|                                     | Hashtag_3      | TATCACATCGGT   |
|                                     | Hashtag_4      | ACTGTCTAACGG   |
|                                     | Hashtag_5      | CACATAATGACG   |
|                                     | Hashtag_6      | TAACGACGTGGT   |

## ECCITE-seq protocol

### Preparation of CITE-seq oligos and antibodies:

As described in Stoeckius et al 2018 cell hashing manuscript: <https://doi.org/10.1186/s13059-018-1603-1>

Sections of protocol that differ from the 10x Genomics V(D)J kit are highlighted in flowchart below

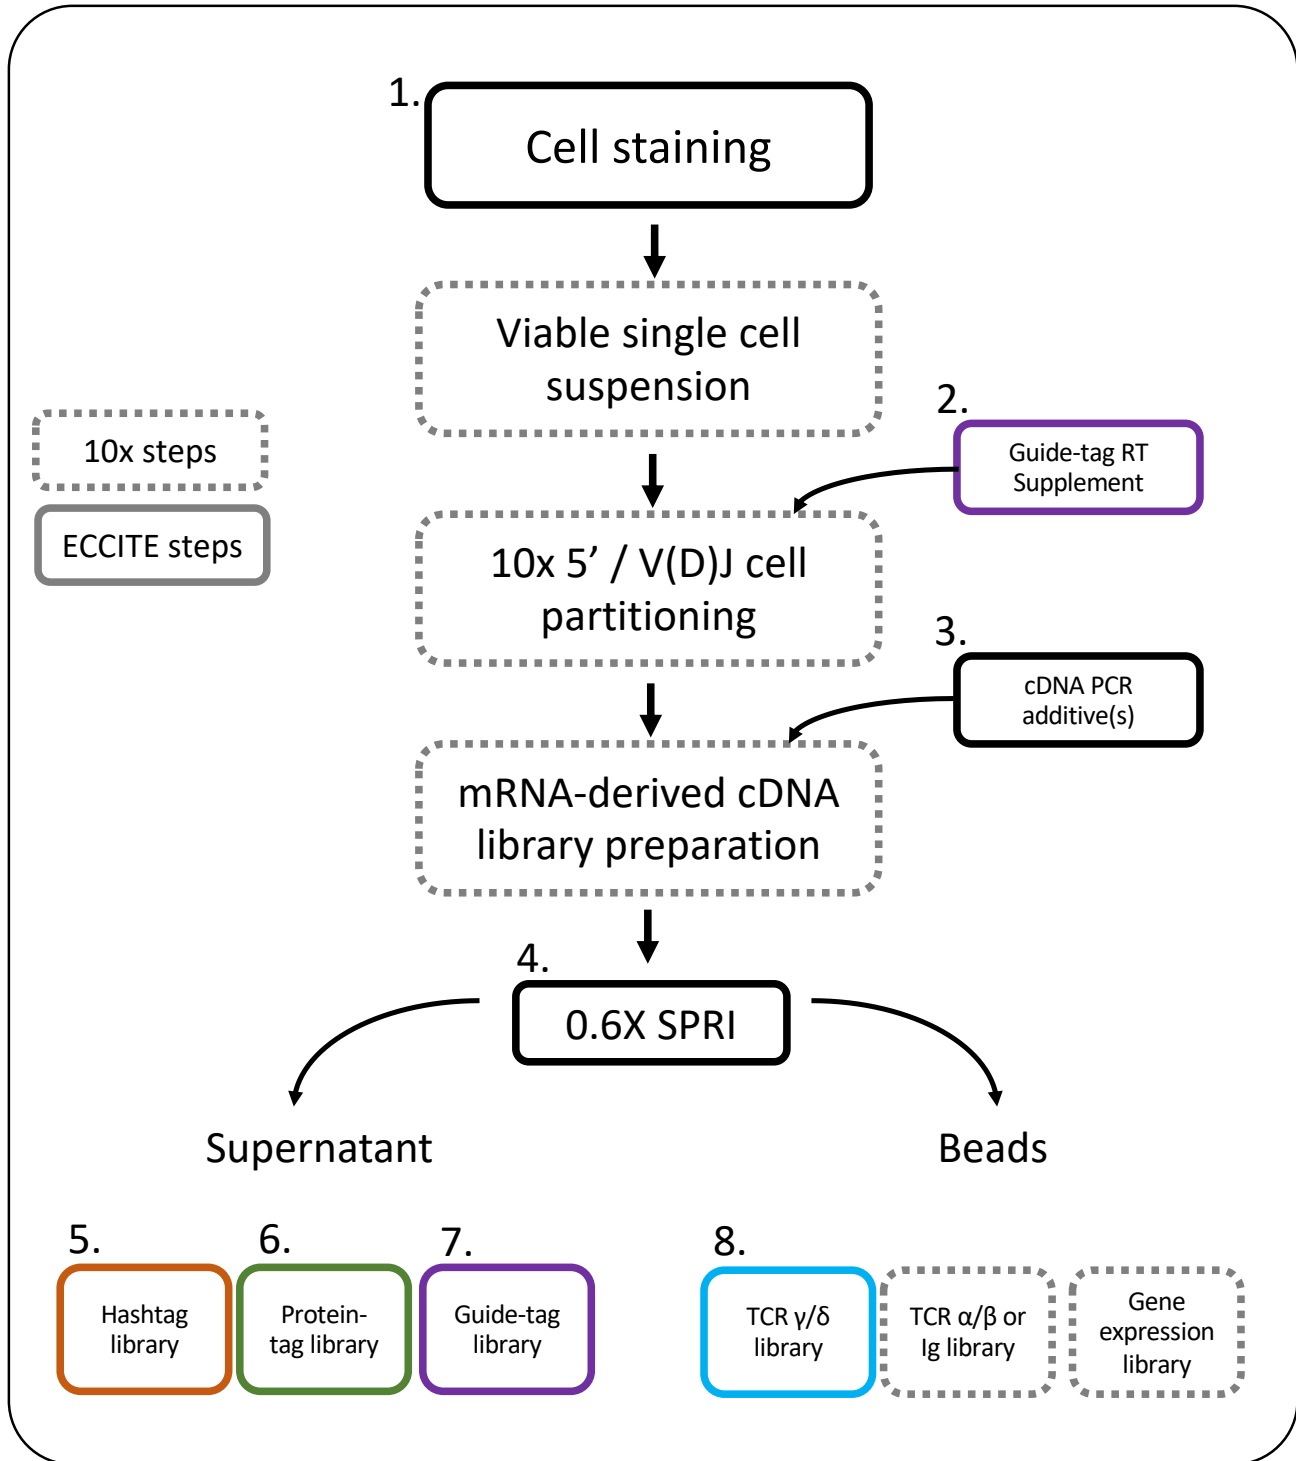

**CITE-seq run:****1. Cell staining**

- Obtain all single cell suspensions from different samples/conditions that will be multiplexed in the run. Keep samples in separate tubes until after cell hashing and shortly before loading cells into the single cell RNA-seq instrument. When aiming to super-load the same sample into one run, divide the sample up into equal proportions before staining with distinct cell hashing antibodies. Keep cell suspensions on ice (unless otherwise stated) at all times.
- Carefully count all cells to ensure accurate quantitation.
  - Make note of cell viability (>95%) and also include dead cells in the total cell count!
  - If you observe many dead cells, live cell enrichment (e.g. Dead Cell Removal kit) is recommended!
- Resuspend ~1-2 million cells in 100 µl Staining buffer (2%BSA, 0.01%Tween in PBS).
- Add 10 µl Fc Blocking reagent (FcX, BioLegend).
- Incubate for 10 minutes at 4°C.
- While cells are incubating in Fc Block, prepare antibody-pool using 1-1.5 µg (or titrated amounts) of each CITE-seq antibody and 1 µg of single cell hashing antibody (pool).
- Add antibody-oligo pool to cells.
- Incubate for 30 minutes at 4°C.
- Wash cells 3 times with 1 mL Staining buffer spin 5 minutes 300g at 4°C.
- Resuspend cells in PBS and filter through 40 µm strainers (e.g. Flowmi cell strainer).
- Verify cell concentration by counting on hemocytometer after filtration.
- Pool all different samples/conditions at desired proportions and immediately proceed to next step.

**Run 10x Genomics single cell V(D)J assay according to manufacturer's instructions with the following modifications:**

**2. Guide-tag RT supplement**

**At reverse transcription step: spike-in the guide RT primer**

- Add 5.9 µl of 2 µM gd\_RT\_v4 primer in the RT reaction (0.12 µM final concentration). Subtract that volume from the water added to the cells.

**3. cDNA PCR additive(s)**

**At cDNA amplification step: spike-in additive primers to increase yield of applicable tag products**

- Add 1 µl of 2 µM protein-tag additive,
- Add 1 µl of 1 µM hashtag additive
- Add 1 µl of 1 µM guide-tag additive

**4. Separation of tag and cDNA libraries**

**After cDNA amplification: separate protein tags and guide tags (~180-200bp) from cDNAs (>300bp)**

- Perform 0.6x SPRI selection to separate protein and guide tags from full-length cDNAs.
- **DO NOT DISCARD SUPERNATANT FROM 0.6x SPRI. THIS CONTAINS THE ADTs and hashtags!**
  - Add 0.6x SPRI to cDNA reaction as described in 10x Genomics or Drop-seq protocol.
  - Incubate 5 minutes and place on magnet.
  - Supernatant contains ADTs and hashtags.
  - Beads contain full length mRNA-derived cDNAs.
- **mRNA-derived cDNA >300bp (beads fraction).**
  - Proceed with standard 10x V(D)J solution for cDNA sequencing library preparation.
- **Hashtags, Protein tags and guide tags ~180-200bp (supernatant fraction)**
  - Purify tags using two 2x SPRI purifications per manufacturer protocol:
    - Add 1.4x SPRI to supernatant to obtain a final SPRI volume of 2x SPRI
    - Transfer entire volume into a low-bind 1.5mL tube and incubate 10 minutes at room temperature.

- Place tube on magnet and wait ~2 minutes until solution is clear.
- Carefully remove and discard the supernatant.
- Add 400  $\mu$ l 80% Ethanol to the tube without disturbing the pellet and stand for 30 seconds.
- Carefully remove and discard the ethanol wash.
- Centrifuge tube briefly and return it to magnet.
- Remove and discard any remaining ethanol.
- Resuspend in beads in 50  $\mu$ l water.
- Perform another round of 2x SPRI purification by adding 100  $\mu$ l SPRI reagent directly onto resuspended beads.
- Mix by pipetting and incubate 10 minutes at room temperature.
- Place tube on magnet and wait ~2 minutes until solution is clear.
- Carefully remove and discard the supernatant.
- Add 200  $\mu$ l 80% Ethanol to the tube without disturbing the pellet and stand for 30 seconds.
- Carefully remove and discard the ethanol wash.
- Repeat wash
- Centrifuge tube briefly and return it to magnet.
- Remove and discard any remaining ethanol and allow the beads to air dry for 2 minutes
- Resuspend beads in 45  $\mu$ l water for each element captured (135  $\mu$ l for example if you need to make protein-tag, hashtag- and guide-tag libraries).
- Pipette mix vigorously and incubate at room temperature for 5 minutes.
- Place tube on magnet and transfer clear supernatant into new tube. This will be your input for the following PCR reactions:

## 5. Hashtag library preparation

PCR in 100  $\mu$ L using 25 pmol of each primer:

45  $\mu$ l bead elution  
 50  $\mu$ l 2x KAPA Hifi PCR Master Mix  
 2.5  $\mu$ l 10  $\mu$ M SI-PCR oligo  
 2.5  $\mu$ l 10  $\mu$ M TruSeq DNA D7xx\_s primer (containing i7 index)

Cycling conditions:

|      |        |  |              |
|------|--------|--|--------------|
| 95°C | 3 min  |  |              |
| 95°C | 20 sec |  |              |
| 64°C | 30 sec |  | ~8-12 cycles |
| 72°C | 20 sec |  |              |
| 72°C | 5 min  |  |              |

Expected product: 180bp

## 6. Protein-tag library preparation

PCR in 100  $\mu$ L using 25 pmol of each primer:

45  $\mu$ l bead elution  
 50  $\mu$ l 2x KAPA Hifi PCR Master mix  
 2.5  $\mu$ l 10  $\mu$ M SI-PCR oligo  
 2.5  $\mu$ l 10  $\mu$ M TruSeq Small RNA RPIx primer (containing i7 index)

Cycling conditions:

|      |        |  |              |
|------|--------|--|--------------|
| 95°C | 3 min  |  |              |
| 95°C | 20 sec |  |              |
| 60°C | 30 sec |  | ~6-10 cycles |
| 72°C | 20 sec |  |              |
| 72°C | 5 min  |  |              |

Expected product: 180bp

## 7. Guide-tag library preparation

### 1. Guide-tag library (this is an enrichment PCR to improve yield and specificity, indexing to follow in subsequent PCR):

PCR in 100  $\mu$ L using 25 pmol of each primer:

45  $\mu$ L bead elution  
 50  $\mu$ L 2x KAPA Hifi Master mix  
 2.5  $\mu$ L 10  $\mu$ M SI-PCR primer  
 2.5  $\mu$ L 10  $\mu$ M gd\_add\_v4 primer

Cycling conditions:

|      |        |  |              |
|------|--------|--|--------------|
| 95°C | 3 min  |  |              |
| 95°C | 20 sec |  |              |
| 64°C | 30 sec |  | ~8-10 cycles |
| 72°C | 20 sec |  |              |
| 72°C | 5 min  |  |              |

Expected product: 220bp

- Purify all tag libraries using 1.6x SPRI purification by adding 160  $\mu$ L SPRI reagent.
  - Incubate 5 minutes at room temperature.
  - Place tube on magnet and wait 1 minute until solution is clear.
  - Carefully remove and discard the supernatant.
  - Add 200  $\mu$ L 80% Ethanol to the tube without disturbing the pellet and stand for 30 seconds (first Ethanol wash).
  - Carefully remove and discard the ethanol wash.
  - Add 200  $\mu$ L 80% Ethanol to the tube without disturbing the pellet and stand for 30 seconds (second Ethanol wash).
  - Carefully remove and discard the ethanol wash.
  - Centrifuge tube briefly and return it to magnet.
  - Remove and discard any remaining ethanol and allow the beads to air dry for 2 minutes.
  - Resuspend beads in 20  $\mu$ L water.
  - Pipette mix vigorously and incubate at room temperature for 5 minutes.
  - Place tube on magnet and transfer clear supernatant to PCR tube.
  - Protein-tag and hashtag libraries are ready to be sequenced.

- Proceed with indexing PCR for the guide-tag library

PCR in 100  $\mu$ L using 25 pmol of each primer:

x  $\mu$ L bead elution (carry over 5-10 ng of the 1<sup>st</sup> PCR product)  
 50  $\mu$ L 2x KAPA Hifi Master mix  
 2.5  $\mu$ L 10  $\mu$ M SI-PCR primer  
2.5  $\mu$ L 10  $\mu$ M Next\_nst\_x primer (containing i7 index)  
 100  $\mu$ L total

Cycling conditions:

|      |        |  |              |
|------|--------|--|--------------|
| 95°C | 3 min  |  |              |
| 95°C | 20 sec |  |              |
| 54°C | 30 sec |  | ~6-10 cycles |
| 72°C | 20 sec |  |              |
| 72°C | 5 min  |  |              |

Expected product: 210bp

- Purify library using 1.6x SPRI as described above.
  - Elute in 20  $\mu$ L water
- Quantify all tag libraries by standard methods (QuBit, BioAnalyzer, qPCR)

**8. Preparation of the TCR  $\gamma/\delta$  library**

The TCR  $\gamma/\delta$  library is prepared by following the 10x Genomics protocol for generating TCR  $\alpha/\beta$  libraries in Chapter 5 of the 10x protocol, but substituting primers as detailed below:

PCR1: Human  $\gamma/\delta$  mix 1 (R1\_hTRDC + R1\_hTRGC) instead of T cell 1

PCR2: Human  $\gamma/\delta$  mix 2 (R2\_hTRDC + R2\_hTRGC) instead of T cell 2

PCR1:

|                      |                                        |
|----------------------|----------------------------------------|
| 2-5 $\mu$ l          | full length cDNA                       |
| 50 $\mu$ l           | 2x KAPA Hifi Master mix                |
| 5 $\mu$ l            | cDNA additive                          |
| 2 $\mu$ l            | 20 $\mu$ M SI-PCR primer               |
| 2 $\mu$ l            | 20 $\mu$ M human $\gamma/\delta$ mix 1 |
| Water to 100 $\mu$ l |                                        |

PCR2:

|                      |                                        |
|----------------------|----------------------------------------|
| 35 $\mu$ l           | bead elution                           |
| 50 $\mu$ l           | 2x KAPA Hifi Master mix                |
| 5 $\mu$ l            | cDNA additive                          |
| 2 $\mu$ l            | 20 $\mu$ M SI-PCR or P5 primer         |
| 2 $\mu$ l            | 20 $\mu$ M human $\gamma/\delta$ mix 2 |
| Water to 100 $\mu$ l |                                        |

Cleanups and PCR conditions are identical to the 10x protocol, with the exception that  $\gamma/\delta$  libraries often require extra cycles of amplification (~12) due to the comparative rarity of  $\gamma/\delta$  T cells compared to  $\alpha/\beta$  T cells in most cell populations.

TCR  $\gamma/\delta$  enriched libraries are further processed according to the 10x Genomics Single Cell V(D)J protocol.

**Sequencing CITE-seq libraries:**

- Protein-tag, hashtag- and guide-tag libraries can be pooled with cDNA sequencing libraries at different proportions depending on the size of the antibody and guide panels. Typically, to obtain sufficient read coverage for all libraries we sequence protein-tag libraries in 3-10% of a lane, hashtag libraries in 2-5% of a lane and guide-tag libraries in 5-10% of a lane with the remainder dedicated to the cDNA library.

**Oligonucleotide sequences:**

**Protein tags:** These contain standard small TruSeq RNA read 2 sequences and can be amplified using Illumina's Truseq Small RNA primer sets (RPIx – primers, see example RPI1 below). See example below with a 12nt barcode:

example: /5AmMC12/CCTTGGCACCCGAGAATTCCAxxxxxxxxCCCATATAAGAAA

**Hashtags:** These contain standard TruSeq DNA read 2 sequences and can be amplified using truncated versions of Illumina's TruSeq DNA primer sets (see example D701\_s below). See example below with a 12nt barcode:

example: /5AmMC12/GTGACTGGAGTTCAGACGTGTGCTCTTCCGATCTxxxxxxxxCCCATATAAGAAA

**Guide tags** arise after reverse transcription of sgRNAs primed by the oligo:

sg\_RT\_v4: AGCAAGTGAGAAGCATCGTGTCAAAGCACCGACTCGGTGCCAC

**Oligos required for tag library amplification and TCR  $\gamma/\delta$  enrichment:**

- 10x Genomics SI-PCR primer  
5' AATGATACGGCGACCACCGAGATCTACACTCTTTCCCTACACGACGC\*T\*C
- Protein-tag additive primer  
5' CCTTGGCACCCGAGAATT\*C\*C
- Hashtag additive primer  
5' GTGACTGGAGTTCAGACGTGTGC\*T\*C
- Guide-tag additive primer  
5' AGCAAGTGAGAAGCATCGTG\*T\*C
- Illumina Small RNA RPI1 primer (for protein-tag amplification; [i7 index](#), Oligonucleotide sequences © 2015 Illumina, Inc)  
5' CAAGCAGAAGACGGCATACGAGxxxxxxxxGTGACTGGAGTTCCTTGGCACCCGAGAATTC\*C\*A
- Illumina TruSeq D701\_s primer (for hashtag amplification; [i7 index](#), shorter than the original Illumina sequence)  
5' CAAGCAGAAGACGGCATACGAGATxxxxxxxxGTGACTGGAGTTCAGACGTGT\*G\*C
- Next\_nst\_x: (custom primer for guide-tag amplification; [i7 index](#), *scaffold annealing region*)  
5' CAAGCAGAAGACGGCATACGAGATxxxxxxxxGTCTCGTGGGCTCGGAGATGTGTATAAGAGACAGTATTCTAGCTCTAAA\*A\*C
- R1\_hTRDC primer: (for Human  $\gamma/\delta$  mix 1)  
5' AGCTTGACAGCATTGTA CTTC
- R1\_hTRGC primer: (for Human  $\gamma/\delta$  mix 1)  
5' TGTGTCGTTAGTCTTCATGGTGTTC
- R2\_hTRDC primer: (for Human  $\gamma/\delta$  mix 2)  
5' TCCTTACCAGACAAGCGAC
- R2\_hTRGC primer: (for Human  $\gamma/\delta$  mix 2)  
5' GATCCAGAATCGTGTGCTC



- \* Phosphorothioate bond
- B C or G or T; not A nucleotide

**Materials and Kits needed:**

- FC blocking reagent (e.g. BioLegend FcX)
- 8-strip PCR tubes, **emulsion safe (!)** (e.g. TempAssure PCR 8-strips, USA Scientific)
- Bioanalyzer chips and reagents (DNA High Sensitivity kit, Agilent)
- SPRiselect reagent (GE Healthcare, B23317)
- E-gel 4% (Invitrogen, USA)
- Low-bind 1.5 mL tubes (Common lab suppliers)
- PCR Thermocycler (e.g. Bio-Rad, T100)
- Magnetic tube rack (e.g. Invitrogen, USA)
- Qubit (Invitrogen, USA)
- Hemocytometer (e.g. Fuchs Rosenthal)
- DMSO (Common lab suppliers).
- PBS (Common lab suppliers)
- Tween20 (Common lab suppliers)
- TE pH 8.0 (Common lab suppliers)
- BSA (DNAse, RNAse and protease free, e.g. VWR #0332-25G)
- Dead Cell Removal Kit (e.g. Miltenyi)
